# Supplementary material for: Representing Contemporary Paramedic Practice in Canada: Development of the National Competency Framework for Paramedics
Source: Preprints.org preprint supplement (doi:10.20944/preprints202404.0688.v1), 2024-04-10
Supplement: Supplementary file 1 [file supplementary]

Supplementary File 4 – Domains and professional activities within NCFP  
Representing Contemporary Paramedic Practice in Canada: Development of the National  
Competency Framework for Paramedics.

**Person-centred care**

*Overall guiding principle: Patients and their communities first.*

A.1 Paramedics apply holistic person-centred approaches to care to optimize experiences and outcomes.

A.2 Paramedics apply care partner-centred approaches to optimize experiences and outcomes.

A.3 Paramedics provide care along a health and social continuum while ensuring equitable access to care.

A.4 Paramedics integrate concepts of structural and cultural competence when interacting with people receiving care, care partners, and healthcare teams.

A.5 Paramedics integrate structural and cultural competence when interacting with Indigenous Peoples, including awareness of Indigenous ways of knowing and healing.

A.6 Paramedics apply the principles of an integrated palliative care approach across the illness trajectory.

A.7 Paramedics care for people throughout their life journey and adjust their assessment, care planning and management, as appropriate.

A.8 Paramedics perform patient assessment including physical examination, diagnostic testing, and comprehensive history taking.

**Collaborative care**

*Overall guiding principle: Integrated healthcare framework.*

B.1 Paramedics develop and demonstrate professional core skills, attitudes, and decision-making in their interactions.

B.2 Paramedics create shared understanding through written, verbal, and non-verbal means.

B.3 Paramedics undertake scene assessment and management utilizing resources and personnel specific to context.

B.4 Paramedics participate in care planning in collaboration with other professionals, public safety personnel, and agencies, in co-located and dispersed teams.

B.5 Paramedics collaborate with other professionals, public safety personnel, and public health officials in the event of major or public health incidents.

## **Safe care**

*Overall guiding principle: Evidence informed practice and systems.*

C.1 Paramedics provide care that ensures physical and psychological safety for patients and care partners.

C.2 Paramedics establish the most appropriate plan for care, follow-up, referral, education, and transfer of care.

C.3 Paramedics provide care, including appropriate interventions, diagnostics, and disposition decisions for a variety of clinical conditions.

C.4 Paramedics operate a variety of vehicles under emergency and non-emergency conditions.

## **Self care**

*Overall guiding principle: Healthy professionals.*

D.1 Paramedics engage in their own personal health and well-being through ongoing integration of experiences and self-reflective practices that contribute to safe, effective care.

D.2 Paramedics maintain personal health and wellbeing to enable competent and safe practice.

D.3 Paramedics maintain awareness of and advocate for the health and well-being of fellow paramedics and other care team members.

## **Professional care**

*Overall guiding principle: Professional autonomy.*

E.1 Paramedics maintain an ethical position that prioritizes and respects the person receiving care.

E.2 Paramedics acknowledge their role to address and respond to planetary health issues.

E.3 Paramedics undertake self-directed continuing education and continuing professional development activities.

E.4 Paramedics acknowledge and work to ensure fair and equitable opportunities for all to succeed within the profession.

E.5 Paramedics interpret, synthesize, and apply research evidence and assess its relevance to improve paramedic practice.

E.6 Paramedics support and undertake quality improvement activities to improve paramedic practice.

E.7 Paramedics understand and promote the role of the paramedic within the evolving profession of paramedicine.
