# Supplementary material for: Representing Contemporary Paramedic Practice in Canada: Development of the National Competency Framework for Paramedics
Source: Preprints.org preprint supplement (doi:10.20944/preprints202404.0688.v1), 2024-04-10
Supplement: Supplementary file 2 [file supplementary]

## CONFERD-HP Checklist: Development of the National Competency Framework for Paramedics.

| Section/topic                        | Item      | Checklist item                                                                                                                                                                                                                                                                                                                                             | Location where item is reported |
|--------------------------------------|-----------|------------------------------------------------------------------------------------------------------------------------------------------------------------------------------------------------------------------------------------------------------------------------------------------------------------------------------------------------------------|---------------------------------|
| <b>Title and abstract</b>            |           |                                                                                                                                                                                                                                                                                                                                                            |                                 |
| Title                                | <b>1a</b> | Identification as a competency framework in the title.                                                                                                                                                                                                                                                                                                     | Title page                      |
|                                      | <b>1b</b> | Identification of intended profession and level of practice/stage of training in title.                                                                                                                                                                                                                                                                    | Title page                      |
| Structured abstract/summary          | <b>2</b>  | Structured summary that includes intended user(s) and use(s) of the framework, the purpose of the framework, the development process and methods used.                                                                                                                                                                                                     | Abstract, P 1                   |
| Definition(s)                        | <b>3</b>  | Defined or referenced definitions for competence, competency and other key terms used to promote understanding of the framework.                                                                                                                                                                                                                           | Step 1, P 11                    |
| <b>Framework development</b>         |           |                                                                                                                                                                                                                                                                                                                                                            |                                 |
| Rationale and justification          | <b>4</b>  | Description of rationale and justification for the development of the framework including supportive references where possible.                                                                                                                                                                                                                            | Intro, P 2                      |
| Purpose and use                      | <b>5a</b> | Description of the purpose of the framework.                                                                                                                                                                                                                                                                                                               | Step 1, P 9                     |
|                                      | <b>5b</b> | Description of the intended use(s) of the framework.                                                                                                                                                                                                                                                                                                       | Step 1, P 9                     |
|                                      | <b>5c</b> | Description of the intended user(s) of the framework.                                                                                                                                                                                                                                                                                                      | Step 1, P 10                    |
| Developer group                      | <b>6</b>  | Description of the qualifications and expertise of those leading the development of the framework.                                                                                                                                                                                                                                                         | DG, P 7                         |
| Oversight/governance group           | <b>7</b>  | Description of the group that had oversight of the framework, the purpose and expertise of the group members, how they reviewed the work and/or contributed to the development.                                                                                                                                                                            | SG, P 5-6                       |
| Theoretical/conceptual approach(es)  | <b>8</b>  | Description of theoretical/conceptual approach(es) used to develop the framework including references and rationale for their use.                                                                                                                                                                                                                         | P 3                             |
| <b>Development process</b>           |           |                                                                                                                                                                                                                                                                                                                                                            |                                 |
| Process and methods                  | <b>9a</b> | Description of each step of the development process.                                                                                                                                                                                                                                                                                                       | Steps 1-6, P 9-19               |
|                                      | <b>9b</b> | Description of how existing literature was gathered and used to inform the competency framework development. Provide a list of references used.                                                                                                                                                                                                            | P 12; Supp File 3; Ref #21      |
|                                      | <b>9c</b> | Description of all methods used throughout the development process including associated reference(s) and details of any modifications.                                                                                                                                                                                                                     | P 5-9; Table 1; Ref #21         |
| End-user contributions               | <b>10</b> | Description of all stakeholders, including end users of both the framework (e.g., the professional group consulted) and the services (e.g., patients/consumers and other healthcare professionals) who contributed to the development process, how they were selected (with considerations of equity, diversity and inclusion), and how they participated. | P 5-7; Supp File 1              |
| Ethics                               | <b>11</b> | Description of ethical considerations and approvals obtained where applicable.                                                                                                                                                                                                                                                                             | Ethics, P 9                     |
| <b>Evaluation and implementation</b> |           |                                                                                                                                                                                                                                                                                                                                                            |                                 |
| Evaluation                           | <b>12</b> | Description of the approach for evaluating the draft competency framework, including how feedback from stakeholders was gathered and used.                                                                                                                                                                                                                 | Step 5 & 6, P 15-19             |
| Implementation                       | <b>13</b> | Suggestion for how the framework should be implemented and in what settings.                                                                                                                                                                                                                                                                               | Step 6, P 19                    |
| <b>Funding and COI</b>               |           |                                                                                                                                                                                                                                                                                                                                                            |                                 |
| Funding                              | <b>14</b> | Description of all funding sources and other support received for the development of the framework and the role of the funder(s).                                                                                                                                                                                                                          | Title page                      |
| Conflict of interest                 | <b>15</b> | Description of how conflicts of interest were considered and managed in the development process.                                                                                                                                                                                                                                                           | Title page                      |
