# Supplementary material for: Representing Contemporary Paramedic Practice in Canada: Development of the National Competency Framework for Paramedics
Source: Preprints.org preprint supplement (doi:10.20944/preprints202404.0688.v1), 2024-04-10
Supplement: Supplementary file 3 [file supplementary]

Archive with 6 entries (6 files):
- CONFERD-HP Guideline completed.pdf
- Supplementary File 1 - NCFP group membership.pdf
- Supplementary File 2 - Knowledge Brokering Strategy.pdf
- Supplementary File 3 - Cross-referenced and source materials.pdf
- Supplementary File 4 - Domains and activities within NCFP.pdf
- Supplementary File 5 - Mapping of six-step and CSA processes.pdf
