# Supplementary material for: Representing Contemporary Paramedic Practice in Canada: Development of the National Competency Framework for Paramedics
Source: Preprints.org preprint supplement (doi:10.20944/preprints202404.0688.v1), 2024-04-10
Supplement: Supplementary file 3 [file supplementary › Supplementary File 1 - NCFP group membership.pdf]

Supplementary File 1 – Membership of NCFP groups  
Representing Contemporary Paramedic Practice in Canada: Development of the National Competency Framework for Paramedics.

**Steering Group (SG)**

Pierre Poirier  
Dr. Alan M Batt  
David Deines  
David Cassista  
Jeanne Bank  
Ron Meyers

**Development Group (DG)**

Dr. Alan M Batt (Lead)  
Jennifer Bolster (RA)  
Meghan Lysko (RA)  
Dr. Becky Donelon  
Dr. Charlene Vacon  
Chelsea Lanos  
Cheryl Cameron  
Dugg Steary  
Dr. Elizabeth A Donnelly  
Jeanne Bank  
Mary Osinga  
Dr. Michael Austin  
Noël Dunn  
Paige Mason  
Rene Lapierre  
Sean Teed  
Tyne M Lunn  
Dr. Walter Tavares  
William Johnston  
*\*Sean Hackett*  
*\*Dr. Ryan Strum*  
*\*Dr. Ron Bowles*  
*\*Dr. Tim Essington*

*\* These members served on the DG for a period during the project.*

**CSA Group Z1660**

**Technical Committee (TC)**

Pierre Poirier (Chair)  
Carl Damour  
Carla Roy  
Chris Hood  
Cliff Lemoal  
Dave Deines  
David Dufour  
Derek Cassista

Dr. Ian Blanchard  
Jean-Sebastien Morin  
Jeff Gunner  
Jessica Chilton  
Jodi Possia  
John Clark  
Kevin Morgan  
Mary Osinga  
Dr. Matthew S Leyenaar  
Michelle Bessas  
Noël Dunn  
Paige Mason  
Dr. Renee MacPhee  
Rob Schlamp  
Sebastien Legare  
Selena Letain  
Dr. Shane Knox  
Dr. Tim Essington  
Tim Stairs  
Tom Zajac  
Dr. Walter Tavares  
William Johnston

**Working Group (WG) leads**

Amber Hultink  
Dr. Becky Donelon  
Cheryl Cameron  
Dr. Elizabeth A Donnelly  
Jay Walker  
Jean-Sebastian Morin  
Jeff Gunner  
Jennifer Doyle  
Jodi Bender  
Mary Osinga  
Mathieu Grenier  
Paige Mason  
Dr. Polly Ford-Jones  
Dr. Ryan Strum  
Sean Teed  
Tyne M Lunn  
William Johnston

**Working Group (WG) members**

Adam Greene  
Aileen Boyd  
Allan Lapierre

Alexandra Shemko  
Dr. Alix Carter  
Dr. Aman Hussain  
Amanda MacIvor  
Amber Hultink  
Andrei Axenov  
Angus Campbell  
Anneke Fidler  
Dr. Becky Donelon  
Ben Tedder  
Benoit Jolicoeur  
Bill (William) Leverett  
Bob Noble  
Brad Reid  
Bradford John Fraser  
Brent McLeod  
Brian McNamara  
Brittany D'Angelo  
Carla Roy  
Charmane Learning  
Chelsey Phaff  
Cheryl Cameron  
Chris Huish  
Christian Pembroke  
Christopher Mistiades  
Colby Burwell  
Curtis Farrell  
Curtis Schaefer  
Dale Button  
Danny Kustra  
Daphne Stevenson  
Daron McDonald  
Darren Petty  
David Dufour  
David Feargrieve  
David Libby  
Donald Osetsky  
Dr. Graham G Munro  
Dr. Elizabeth A Donnelly  
Elizabeth Williams  
Erika Tjostheim  
Gareth Hughes  
Gurkan Özel  
Heather Cook  
Heather MacMillan  
Ivanette Hargreaves  
Jacelynn Reinbolt

Supplementary File 1 – Membership of NCFP groups  
Representing Contemporary Paramedic Practice in Canada: Development of the National  
Competency Framework for Paramedics.

Jack Mulcahy  
Jack Shier  
Jake Coady  
James Cox  
James Marks  
James Shearer  
Jameson McIntosh  
Janel Swain  
Jason Tulk  
Jason Williams  
Jay Walker  
Jean-Philippe Lambert St-  
Marie  
Jean-Sebastien Morin  
Jeanne Bank  
Jeff Gunner  
Jen Price  
Jennifer Bacon  
Jennifer Bolster  
Jennifer Doyle  
Jennifer McVey  
Jennifer Moore  
Jeremy Kieffer  
Joanne Moss  
Jodi Bender  
John Todd Ferris  
Justyna Augustyn  
Kadem Kamum Ptar  
Kaitlin Peters  
Keith Tyler  
Kevin Hons  
Dr. Kevin Lobay  
Kieran Moore  
Kristen Steary  
Laura Hirello  
Leah Braun  
Leonard James  
Liana Sikharulidze  
Lindsey Boechler  
Lyon River Kengis  
Marc Goudie  
Mary Osinga  
Mathieu Desfosses  
Mathieu Grenier  
Matt Cruchet  
Matthew Harris  
Matthew Hogan

Dr. Matthew S Leyenaar  
Meagan Slack  
Megan Tait  
Michael David McMillan  
Michael Todd Hennig  
Michael Thomas  
Michele Smith  
Michelle Casanova  
Mike Sugimoto  
Mike Thomas  
Mike Webster  
Miles Randall  
Mitchell Dawley  
Nate Alaimo  
Nechelle Wall  
Neil Freckleton  
Nick Richards  
Nicola Stothard  
Noël Dunn  
Paige Mason  
Patrick Auger  
Patrick Hepditch  
Patrick Suthers  
Pat Spadafora  
Patrick Hepditch  
Paul Kerrivan  
Dr. Polly Ford-Jones  
Rachael Pfeil  
Randy Reinholdt  
Richard Alvarez  
Rob Evans  
Rob Ritchie  
Robert Schlamp  
Ronald Shaughnessy  
Rory A. Marshall  
Ryan Howard  
Dr. Ryan Strum  
Ryo Iwauchi-Paradis  
Samuel Wolf Leg  
Scott Mullin  
Scott Thomson  
Sean Hackett  
Sean Teed  
Selena Letain  
Shannon Leduc  
Shari Lutz  
Sheldon Thunstrom

Stephanie Hartwell Buffalo  
Stephanie Schmidt  
Susan Dugas  
Taryn Spitzer  
Tegan Fletcher  
Travis Brown  
Troy Manning  
Tyler MacCuspic  
Tyne M Lunn  
William Johnston  
Zachary Cantor

**NCFP Supporting  
Documents Leads**

Dr. Becky Donelon – PAC  
Education and Practice  
Guidance

Dr. Alan Batt – PAC Career  
Framework for Paramedics

Chelsea Lanos – PAC Code  
of Ethics
