# Supplementary material for: Representing Contemporary Paramedic Practice in Canada: Development of the National Competency Framework for Paramedics
Source: Preprints.org preprint supplement (doi:10.20944/preprints202404.0688.v1), 2024-04-10
Supplement: Supplementary file 3 [file supplementary › Supplementary File 2 - Knowledge Brokering Strategy.pdf]

## Publications

Batt, A.M.; Lysko, M.; Bolster, J.L.; Poirier, P.; Cassista, D.; Austin, M.; Cameron, C.; Donnelly, E.A.; Donelon, B.; Dunn, N.; Johnston, W.; Lanos, C.; Lunn, T.M.; Mason, P.; Teed, S.; Vacon, C.; Tavares, W. Identifying Features of a System of Practice to Inform a Contemporary Competency Framework for Paramedics in Canada. Preprints 2024, 2024031503. <https://doi.org/10.20944/preprints202403.1503.v1>

Batt, AM; Bolster, J; Poirier, P; Cassista, D; Bank, J; Austin, M; Bowles, R; Cameron, C; Donnelly, E; Donelon, B; Dunn, N; Johnston, W; Lanos, C; Lapierre, R; Lunn, T; Lysko, M; Mason, P; Osinga, M; Steary, D; Teed, S; Vacon, C; and Tavares, W. Developing the National Competency Framework for Paramedics in Canada: update 6. *Canadian Paramedicine*. 2024;47(1):6-8.

Batt, AM; Bolster, J; Poirier, P; Bank, J; Austin, M; Cameron, C; Donnelly, E; Donelon, B; Dunn, N; Essington, T; Johnston, W; Lanos, C; Lapierre, R; Lunn, T; Lysko, M; Mason, P; Osinga, M; Steary, D; Teed, S; and Tavares, W. Developing the National Occupational Standard for Paramedics in Canada: update 5. *Canadian Paramedicine*. 2023;46(5):6-8.

Batt, AM; Bolster, J; Poirier, P; Bank, J; Austin, M; Cameron, C; Donnelly, E; Donelon, B; Dunn, N; Essington, T; Hackett, S; Johnston, W; Lanos, C; Lapierre, R; Lunn, T; Lysko, M; Mason, P; Osinga, M; Steary, D; Teed, S; and Tavares, W. Developing the National Occupational Standard for Paramedics in Canada: update 4. *Canadian Paramedicine*. 2023;46(2):18-20.

Batt, AM; Poirier, P; Bank, J; Bolster, J; Austin, M; Cameron, C; Donnelly, E; Donelon, B;

Dunn, N; Essington, T; Hackett, S; Johnston, W; Lapierre, R; Lunn, T; Lysko, M; Mason, P; Osinga, M; Steary, D; Teed, S; and Tavares, W. Developing the National Occupational Standard for Paramedics in Canada: update 3. *Canadian Paramedicine*. 2022;45(6):6-8.

Bolster, J; Batt, AM on behalf of the NOSP Development Group. Developing a competency framework for paramedics in Canada: The National Occupational Standard for Paramedics. *Canadian Paramedicine*. 2022; 45(4).

Batt, AM; Poirier, P; Bank, J; Bolster, J; Bowles, R; Cameron, C; Donnelly, E; Donelon, B; Dunn, N; Essington, T; Johnston, W; Lapierre, R; Lysko, M; Mason, P; Osinga, M; Steary, D; Strum, R; and Tavares, W. Developing the National Occupational Standard for Paramedics in Canada: update 2. *Canadian Paramedicine*. 2022;45(4).

Batt, AM; Poirier, P; Bank, J; Bolster, J; Bowles, R; Cameron, C; Donelon, B; Dunn, N; Essington, T; Johnston, W; Lapierre, R; Lysko, M; Mason, P; Steary, D; and Tavares, W. Developing the National Occupational Standard for Paramedics in Canada: update 1. *Canadian Paramedicine*. 2022; 45(2):6-8.

Bolster, JL; Pithia, P; Batt, AM. Emerging concepts in the paramedicine literature to inform the revision of a pan-Canadian competency framework for paramedics: a restricted review. *Cureus Journal of Medical Science*. 2022;14(12):e32864. <https://doi.org/10.7759/cureus.32864>.

## Presentations

Independent First Nations Alliance- Health Service and Integrated EMS, March 6, 2024

EMS Board of Prince Edward Island, March 1, 2024

Supplementary File 2 – Knowledge brokering strategy for NCFP  
Representing Contemporary Paramedic Practice in Canada: Development of the National  
Competency Framework for Paramedics.

Saskatchewan Health Authority, February 26,  
2024

Ontario Community Paramedicine  
Knowledge Exchange Expo, February 20, 2024

Queen’s University and Weeneebayko Area  
Health Authority, December 18, 2023

EMS Asia 2023, Tokyo, November 30, 2023

Paramedic Association of Newfoundland and  
Labrador, October 30, 2023

BC Emergency Health Services, Indigenous  
and Community Health, October 16, 2023

Australasian College of Paramedicine  
International Conference, Melbourne,  
Australia, Sept 15, 2023

Paramedic Chiefs of Canada Leadership  
Summit, Kelowna, BC, June 15, 2023

County of Renfrew Paramedic Research  
Symposium, Calabogie, ON, Canada, May 30,  
2023

International Roundtable on Community  
Paramedicine, Nottingham, UK, May 23, 2023

Paramedic Chiefs of Canada Board meeting,  
April 13, 2023

Ontario Paramedic Association Board  
meeting, Belleville, ON, April 13, 2023

Canadian Organisation of Paramedic  
Regulators Board meeting, March 29, 2023

Paramedic Association of Canada Board  
meeting, Toronto, ON, February 6, 2023

Saskatchewan College of Paramedics,  
November 25, 2022

Paramedic Association of New Brunswick  
Conference, St. John, NB, Canada, October  
15, 2022

Ontario Base Hospital Group, September 14,  
2022

Paramedicine Across Canada Expo,  
Saskatoon, SK, Canada, September 8, 2022

Ontario College Paramedic Program  
Coordinators, June 3, 2022

**Public review feedback – dissemination  
and direct requests for feedback**

Alberta College of Paramedics

Alberta Health Services

Ambulance Paramedics of BC

BCEHS

BCEHS Community and Indigenous Programs

Canadian Armed Forces

Canadian Paramedic Educators Chapter

Canadian Partnership Against Cancer

Canadian Virtual Hospice

Caregiver Co-Design Team, University of  
Alberta

Canadian Organisation of Paramedic  
Regulators

College of Paramedics Nova Scotia

Covenant Health - Palliative Institute

CSA Technical Committee - Community  
Paramedicine

CSA Technical Committee – Canadian  
Paramedic Information System

CSA Technical Committee – Response to  
Opioid Crisis

CSA Technical Committee - Psychological  
Health and Safety in PSO

NCFP Development Group

EMS Board of Prince Edward Island

First Nations Health Authority, BC

Healthcare Excellence Canada

Independent First Nations Alliance

Indigenous Services Canada

Justice Institute of BC, Health Sciences

Supplementary File 2 – Knowledge brokering strategy for NCFP  
Representing Contemporary Paramedic Practice in Canada: Development of the National  
Competency Framework for Paramedics.

|                                                                                |                                       |
|--------------------------------------------------------------------------------|---------------------------------------|
| Broad dissemination on social media<br>platforms X (Twitter), LinkedIn         | Alberta College of Paramedics         |
| McNally Project for Paramedicine Research                                      | Alberta Health Services EMS           |
| Ministry of Health, ON                                                         | Andrew Grimes                         |
| Ministry of Long-Term Care, ON                                                 | BCEHS                                 |
| National Association of EMS Physicians                                         | BCEHS Indigenous Health Program       |
| Ontario Association of Paramedic Chiefs<br>(OAPC)                              | Carl Damour                           |
| Eastern Chiefs group, OAPC                                                     | Cheryl Cameron                        |
| Ontario Community Paramedicine<br>Knowledge Exchange Expo                      | Dalhousie University                  |
| Ontario Health                                                                 | Dakota Stone                          |
| Ontario Paramedic Association                                                  | Dr. Susan Glover Takahashi            |
| Ontario Provincial Advisory Committee on<br>Community Paramedicine             | EHS Nova Scotia                       |
| PAC eNews                                                                      | Eugene Boles                          |
| Palliative Care Coalition of Canada                                            | Georgian College                      |
| Paramedic Association of Manitoba                                              | IMPACC Project, Team Primary Care     |
| Paramedic Association of New Brunswick                                         | Independent First Nations Alliance    |
| Paramedic Association of Newfoundland and<br>Labrador                          | James Genga                           |
| Paramedic Association of PEI                                                   | Jason Klatt                           |
| Paramedic Chiefs of Canada                                                     | Jon Faulkner                          |
| Paramedics and Palliative Care National<br>Community of Practice               | Jonathan Hesler                       |
| Saskatchewan Health Authority                                                  | Justice Institute of British Columbia |
| Sioux Lookout First Nations Health Authority                                   | Dr. Kevin Lobay                       |
| Weeneebayko Area Health Authority                                              | Laura Smith                           |
| Weeneebayko Area Health Authority &<br>Queen's University Curriculum Committee | Leith Elizabeth Saunders              |
| Working Group leads                                                            | Luke Umble                            |
|                                                                                | Meagan Slack                          |
|                                                                                | Meaghan Maddigan                      |
|                                                                                | Michael Kenneth Corman                |
|                                                                                | Michael Ryan Kennedy                  |
|                                                                                | Michael Wilson                        |
|                                                                                | Michael Wilson                        |
|                                                                                | Natalee Dennis                        |
| <b>Public Review feedback – comments<br/>received</b>                          |                                       |
| Adam Nichols                                                                   |                                       |

Supplementary File 2 – Knowledge brokering strategy for NCFP  
Representing Contemporary Paramedic Practice in Canada: Development of the National  
Competency Framework for Paramedics.

Natalie Labelle

Natasha Parent

Nicole Corrado

Ontario Health

Oxford College

Pallium Canada

Paramedic Association of Manitoba

Paramedic Association of New Brunswick

Paramedics/Palliative Care National  
Community of Practice

Public Services Health and Safety  
Association

Randi McDermott

Rose Kouwenberg

Ryan Brown

Samantha Jurkowski

Scot Phelps

Sean Hackett

Tanya Kendall

Timothy Ford

Tyne M Lunn

Vicky White

## **Awards**

**‘Best of the best’ Highest Quality Research  
Award**, *Australasian College of Paramedicine  
International Conference*, September 2023.  
Batt et al. Developing a competency  
framework for contemporary paramedic  
practice in Canada.
