# Supplementary material for: Representing Contemporary Paramedic Practice in Canada: Development of the National Competency Framework for Paramedics
Source: Preprints.org preprint supplement (doi:10.20944/preprints202404.0688.v1), 2024-04-10
Supplement: Supplementary file 3 [file supplementary › Supplementary File 3 - Cross-referenced and source materials.pdf]

### **Paramedic system documents**

Batt, A.M.; Lysko, M.; Bolster, J.L.; Poirier, P.; Cassista, D.; Austin, M.; Cameron, C.; Donnelly, E.A.; Donelon, B.; Dunn, N.; Johnston, W.; Lanos, C.; Lunn, T.M.; Mason, P.; Teed, S.; Vacon, C.; Tavares, W. Identifying Features of a System of Practice to Inform a Contemporary Competency Framework for Paramedics in Canada. Preprints 2024, 2024031503.

<https://doi.org/10.20944/preprints202403.1503.v1>

Batt, Alan M, Jeanne Bank, Jennifer Bolster, and Priya Pithia. "Canadian Paramedic Landscape Review and Standards Roadmap." Toronto: CSA Group, 2023. <https://www.csagroup.org/article/research/canadian-paramedic-landscape-review-and-standards-roadmap/>.

Batt, AM et al. "Advances in Community Paramedicine in Response to COVID-19." Ottawa: CSA Group, 2021. <https://www.csagroup.org/article/research/advances-in-community-paramedicine-in-response-to-covid-19/>.

Bolster, J et al. "Emerging Concepts in the Paramedicine Literature to Inform the Revision of a Pan-Canadian Competency Framework for Paramedics: A Restricted Review." Cureus 14, no. 12 (December 23, 2022). <https://doi.org/10.7759/cureus.32864>.

Bowles, R et al. "Four Dimensions of Paramedic Practice in Canada: Defining and Describing the Profession." Australasian Journal of Paramedicine 14, no. 3 (2017). <https://doi.org/10.33151/ajp.14.3.539>.

CSA Group. "CAN/CSA Z1630:17 Community Paramedicine: Framework for Program Development." Toronto: CSA Group, 2017.

CSA Group. "CSA Z1003.1:18 (R2022) Psychological Health and Safety in the Paramedic Service Organization." Toronto: CSA Group, 2018.

CSA Group. "CSA Z1635:22 Functional requirements and core data set for a Canadian paramedic information system (CPIS)." Toronto: CSA Group, 2022.

CSA Group. "CSA Z1650:21 Paramedic Response to the Opioid Crisis: Education and Training across the Treatment and Care Continuum in out-of-Hospital and Community Settings." Toronto: CSA Group, 2021.

Paramedic Association of Canada. "Canadian Paramedic Profile: Paramedic Roles." Ottawa: Paramedic Association of Canada, 2016.

Paramedic Association of Canada. "Code of Ethics." Ottawa: Paramedic Association of Canada, 2016.

Paramedic Association of Canada. "National Occupational Competency Profile for Paramedics." Ottawa: Paramedic Association of Canada, 2011.

Paramedic Association of Canada. "The Canadian Paramedicine Education Guidance Document." Ottawa: Paramedic Association of Canada, 2018.

Tavares, W et al. "Informing a Canadian Paramedic Profile: Framing Concepts, Roles and Crosscutting Themes." BMC Health Services Research 16, no. 1 (December 2016): 477. <https://doi.org/10.1186/s12913-016-1739-1>.

Tavares, W et al. "Principles and Enabling Factors Guiding Paramedicine in Canada." Ottawa: Paramedic Chiefs of Canada, 2023. <https://www.paramedicchiefs.ca/wp-content/uploads/2023/08/PCC-Full-Report-with-TTPS-FRExecsumm.pdf>.

Tavares, W et al. "Principles to Guide the Future of Paramedicine in Canada." Prehospital Emergency Care 0, no. 0 (August 10, 2021): 1–11. <https://doi.org/10.1080/10903127.2021.1965680>.

### **Competency framework development literature**

Batt, AM et al. “A Six-Step Model for Developing Competency Frameworks in the Healthcare Professions.” *Frontiers in Medicine* 8 (2021): 2601.  
<https://doi.org/10.3389/fmed.2021.789828>.

Batt, AM et al. “CONFERD-HP: Recommendations for Reporting COMpeteNcy FramEwoRk Development in Health Professions.” *British Journal of Surgery* 110, no. 2 (February 1, 2023): 233–41.  
<https://doi.org/10.1093/bjs/znac394>.

Batt, AM et al. “New Ways of Seeing: Supplementing Existing Competency Framework Development Guidelines with Systems Thinking.” *Advances in Health Sciences Education*, May 18, 2021.  
<https://doi.org/10.1007/s10459-021-10054-x>.

Batt, AM et al. “The Development of Competency Frameworks in Healthcare Professions: A Scoping Review.” *Advances in Health Sciences Education* 25, no. 4 (October 2020): 913–87.  
<https://doi.org/10.1007/s10459-019-09946-w>.

Lepre, B et al. “Stakeholder Engagement in Competency Framework Development in Health Professions: A Systematic Review.” *Frontiers in Medicine* 8 (2021): 2226.  
<https://doi.org/10.3389/fmed.2021.759848>.

Murray, N et al. “Does Patient and Public Involvement Influence the Development of Competency Frameworks for the Health Professions? A Systematic Review.” *Frontiers in Medicine* 9 (2022).  
<https://www.frontiersin.org/articles/10.3389/fmed.2022.918915>.

Rich, JV. “Do Professions Represent Competence for Entry-to-Practice in Similar

Ways? An Exploration of Competence Frameworks through Document Analysis.” *International Journal for the Scholarship of Teaching and Learning* 13, no. 3 (2019).  
<https://doi.org/10.20429/ijsotl.2019.130305>.

Thoma, B et al. “Emerging Concepts in the CanMEDS Physician Competency Framework.” *Canadian Medical Education Journal*, September 26, 2022.  
<https://doi.org/10.36834/cmej.75591>.

### **Mapping documents**

AAMC. Diversity, Equity, and Inclusion Competencies Across the Learning Continuum. AAMC New and Emerging Areas in Medicine Series. Washington, DC: AAMC; 2022. <https://www.aamc.org/data-reports/report/diversity-equity-and-inclusion-competencies-across-learning-continuum>

AAMC. Telehealth Competencies Across the Learning Continuum. AAMC New and Emerging Areas in Medicine Series. Washington, DC: AAMC; 2021.  
<https://www.aamc.org/data-reports/report/telehealth-competencies>

Canadian Interprofessional Health Collaborative. “A National Interprofessional Competency Framework.” Vancouver, British Columbia: Canadian Interprofessional Health Collaborative, 2010.  
[https://drive.google.com/file/d/1Des\\_mznc7Rr8stsEhHxl8XMjgiYWzRln/view?usp=sharing](https://drive.google.com/file/d/1Des_mznc7Rr8stsEhHxl8XMjgiYWzRln/view?usp=sharing)

Canadian Organization of Paramedic Regulators. Pan-Canadian Essential Regulatory Requirements.  
<https://copr.ca/regulation-of-paramedics-canada/pan-canadian-essential-regulatory-requirements/>

Canadian Patient Safety Institute. “The Safety Competencies: Enhancing Patient Safety across the Health Professions.” Ottawa,

Supplementary File 3 – List of cross-referenced and source materials  
Representing Contemporary Paramedic Practice in Canada: Development of the National  
Competency Framework for Paramedics.

2009. <https://doi.org/10.1136/bmjqs-2011-000148>.

Government of Canada. “The New Skills for Success Model.” Program descriptions, May 18, 2021.

<https://www.canada.ca/en/services/jobs/trailling/initiatives/skills-success/new-model.html>.

Parmar, J et al. “Competency Framework — Caregiver Centered Care.” University of Alberta, 2021.

<https://www.caregivercare.ca/competency-framework>.

Toronto Region Immigrant Employment Council. Inclusive Workplace Competencies. 2017. <https://triec.ca/wp-content/plugins/competency/TRIEC-Inclusive-Workplace-Competencies.pdf>

### Working group reports

- Community, Public Health, and Primary Care
- Correctional and Remand Practice
- Critical Care and Interfacility transfer
- Cultural Proficiency
- Emergency Department
- Healthy Professionals
- Indigenous Paramedic and Communities Engagement
- Industrial Paramedicine
- Interprofessional Perspectives
- Military Practice
- Palliative and End-of-Life Care
- Patient, Caregiver, and Public Engagement
- Prehospital / Out-of-Hospital Emergency Care

- Rural, Remote, and Isolated
- Special Operations
- Substance Use and Mental Health

### References provided by working groups

Acker, Joseph J., Tania M. Johnston, and Ann Lazarsfeld-Jensen. “Industrial Paramedics, out on Site but Not out of Mind.” *Rural and Remote Health* 14, no. 4 (2014): 2856.

Affleck A, Parks P, Drummond A, Rowe BH, Ovens HJ. Emergency department overcrowding and access block. *Can J Emerg Med*. 2013 Nov;15(6):359–70.

Agarwal G, Pirrie M, McLeod B, et al. Rationale and methods of an Evaluation of the Effectiveness of the Community Paramedicine at Home (CP@home) program for frequent users of emergency medical services in multiple Ontario regions: a study protocol for a randomized controlled trial. *Trials*. 2019;20(1):75. <https://doi.org/10.1186/s13063-018-3107-4>

Alix J.E. Carter, MD, MPH; James B. Gould, BSc†; Peter Vanberkel, PEng, PhD; Jan L. Jensen, ACP, MAHSR; Jolene Cook, MD; Steven Carrigan, MPA; Mark R. Wheatley, ACP; Andrew H. Travers, MSc, MD CJEM Ems Series. Offload zones to mitigate emergency medical services (EMS) offload delay in the emergency department: a process map and hazard analysis.

Allan, Billie, and J Smylie. “First Peoples, Second Class Treatment.” Toronto: Wellesley Institute, 2015. <https://www.wellesleyinstitute.com/wp-content/uploads/2015/02/Summary-First-Peoples-Second-Class-Treatment-Final.pdf>

Allana, A., & Pinto, A. D. (2021). Paramedics Have Untapped Potential to Address Social Determinants of Health in Canada. Healthcare policy = Politiques de sante,

Supplementary File 3 – List of cross-referenced and source materials  
Representing Contemporary Paramedic Practice in Canada: Development of the National Competency Framework for Paramedics.

16(3), 67–75.

<https://doi.org/10.12927/hcpol.2021.26432>

Allana, A., Kuluski, K., Pinto, A., Tavares, W. (2022a). The role of paramedics in integrated models of care. *International Journal of Integrated Care*, 22(S2), 145.

<http://doi.org/10.5334/ijic.ICIC21244>

Allana, A., Tavares, W., Pinto, A., Kuluski, K. (2022b). Designing and governing responsive local care systems – Insights from a scoping review of paramedics in integrated models of care. *International Journal of Integrated Care*, 22, 5. <http://doi.org/10.5334/ijic.6418>

Anderson NE, Robinson J, Goodwin H, Gott M. ‘Mum, I think we might ring the ambulance, okay?’ A qualitative exploration of bereaved family members’ experiences of emergency ambulance care at the end of life. *Palliat Med*. 2022 Oct 1;36(9):1389–95.

Anderson NE, Robinson J, Moeke-Maxwell T, Gott M. Paramedic care of the dying, deceased and bereaved in Aotearoa, New Zealand. *Prog Palliat Care*. 2021;29(2):84–90.

Anderst, A., Conroy, K., Fairbrother, G., Hallam, L., McPhail, A., & Taylor, V. (2020). Engaging consumers in health research: A narrative review. *Australian Health Review: A Publication of the Australian Hospital Association*, 44(5), 806–813.

<https://doi.org/10.1071/AH19202>

A-PD-055-001/AG-001, The Canadian Armed Forces Military Employment Structure (MES), Volume 1 – General

A-PD-055-002/PP-002, Canadian Armed Forces Military Employment Structure (MES), Volume 2 – Occupational Specifications, Part 2 – Non-Commissioned Member Occupation Specifications

A-PD-055-002/PP-004, Canadian Armed Forces Military Employment Structure (MES), Volume 2 – General Specifications, Part 4 – Non-Commissioned Member General Specifications.

Archambault, P. M., McGavin, C., Dainty, K. N., McLeod, S. L., Vaillancourt, C., Lee, J. S., Perry, J. J., Gauvin, F.-P., & Boivin, A. (2018). Recommendations for patient engagement in patient-oriented emergency medicine research. *CJEM*, 20(3), 435–442.

<https://doi.org/10.1017/cem.2018.370>

Armstrong, M. J., Rueda, J.-D., Gronseth, G. S., & Mullins, C. D. (2017). Framework for enhancing clinical practice guidelines through continuous patient engagement. *Health Expectations*, 20(1), 3–10.

<https://doi.org/10.1111/hex.12467>

Ashton C, Duffie D, Millar J. Conserving Quality of Life through Community Paramedics. *Healthc Q*. 2017;20:48-53.

<https://doi.org/10.12927/hcq.2017.25228>

Augustus, J., Yuet Wah, P. & Gardner, P. (2022). *An Introduction to Mental Health in Paramedic Science*. Open University Press, Maidenhead.

Bainbridge, L., Nasmith, L., Orchard, C., & Wood, V. (2010). Competencies for interprofessional collaboration. *Journal of Physical Therapy Education*, 24(1), 6-11.

Baines, R. L., & Regan de Bere, S. (2018). Optimizing patient and public involvement (PPI): Identifying its “essential” and “desirable” principles using a systematic review and modified Delphi methodology. *Health Expectations*, 21(1), 327–335.

<https://doi.org/10.1111/hex.12618>

Barbera L, Taylor C, Dudgeon D. Why do patients with cancer visit the emergency department near the end of life? *CMAJ*. 2010;182(6):563–8.

Barishansky RM, Haller K. Palliative care & EMS. *EMS Mag*. 2007;36(9):58–64.

Barnette Donnelly C, Armstrong KA, Perkins MM, Moulia D, Quest TE, Yancey AH. Emergency Medical Services Provider Experiences of Hospice Care. *Prehosp Emerg Care*. 2018;22(2):237–43.

### Supplementary File 3 – List of cross-referenced and source materials

#### Representing Contemporary Paramedic Practice in Canada: Development of the National Competency Framework for Paramedics.

Batt, A.M., Hultink, A., Lanos, C., Tierney, B., Grenier, M., Heffern, J. Advances in Community Paramedicine in Response to COVID-19. Published online 2021.

Batt, Alan M, Jeanne Bank, Jennifer Bolster, and Priya Pithia. "Canadian Paramedic Landscape Review and Standards Roadmap." Toronto: CSA Group, 2023. <https://www.csagroup.org/article/research/canadian-paramedic-landscape-review-and-standards-roadmap/>.

Bismah, V., Prpic, J., Michaud, S., & Sykes, N. (2017). P018: Prehospital diversion of mental

Blackmore TA. What is the role of paramedics in palliative and end of life care? *Palliat Med*. 2022;36(3):402–4.

Blackwood, J., Armstrong, M. J., Schaefer, C., Graham, I. D., Knaapen, L., Straus, S. E., Urquhart, R., & Gagliardi, A. R. (2020). How do guideline developers identify, incorporate and report patient preferences? An international cross-sectional survey. *BMC Health Services Research*, 20(1), 458.

Boaventura JR, Pessalacia JDR, Ribeiro AA, de Souza FB, da Silva Neto PK, Marinho MR. Palliative care in the pre-hospital service in Brazil: experiences of health professionals. *BMC Palliat Care*. 2022;21(1):4.

Boyd, J., & Kerr, T. (2016). Policing 'Vancouver's Mental Health Crisis': A Critical Discourse Analysis. *Critical Public Health*, 26(4), 418–433.

Brady M. Challenges UK paramedics currently face in providing fully effective end-of-life care. *Int J Palliat Nurs*. 2014;20(1):37–44.

Breyre AM, Bains G, Moore J, Siegel L, Sporer KA. Hospice and Comfort Care Patient Utilization of Emergency Medical Services. *J Palliat Med*. 2022;25(2):259–64.

Breyre AM, Benesch T, Glomb NW, Sporer KA, Anderson WG. EMS Experience Caring and

Communicating with Patients and Families with a Life-Limiting-Illness. *Prehosp Emerg Care*. 2021;1–8.

Breyre AM, Sporer KA, Davenport G, Isaacs E, Glomb NW. Paramedic use of the Physician Order for Life-Sustaining Treatment (POLST) for medical intervention and transportation decisions. *BMC Emerg Med*. 2022 Aug 11;22(1):145.

Brittain M, Michel C, Baranowski L, Armour R, Poll A, Helmer J. Community paramedicine in British Columbia: A virtual response to COVID-19. *Australas J Paramed*. 2020;17. <https://doi.org/10.33151/ajp.17.813>

Burge F, Lawson B, Johnston G, Asada Y, McIntyre PF, Flowerdew G. Preferred and Actual Location of Death: What Factors Enable a Preferred Home Death? *J Palliat Med*. 2015 Dec;18(12):1054–9.

Burge F, Lawson B, Johnston G, Asada Y, McIntyre PF, Grunfeld E, et al. Bereaved family member perceptions of patient-focused family-centred care during the last 30 days of life using a mortality follow-back survey: does location matter? *BMC Palliat Care*. 2014;13:25.

Burge F, Lawson B, Johnston G, Cummings I. Primary care continuity and location of death for those with cancer. *J Palliat Med*. 2003 Dec;6(6):911–8.

Burge F, Lawson B, Johnston G. Family physician continuity of care and emergency department use in end-of-life cancer care. *Med Care*. 2003 Aug;41(8):992–1001.

Burnod A, Lenclud G, Ricard-Hibon A, Juvin P, Mantz J, Duchateau FX. Collaboration between prehospital emergency medical teams and palliative care networks allows a better respect of a patient's will. *Eur J Emerg Med*. 2012;19(1):46–7.

Burstow, B. (2013). A rose by any other name: Naming and the battle against psychiatry.

Supplementary File 3 – List of cross-referenced and source materials  
Representing Contemporary Paramedic Practice in Canada: Development of the National  
Competency Framework for Paramedics.

Butler SM. Optimizing Investment in Housing as a Social Determinant of Health. JAMA Health Forum. 2022;3(9):e223626.

<https://doi.org/10.1001/jamahealthforum.2022.3626>

Cameron C, Arab M, Graham A, Hillier T, Goldstein J. The Canadian paramedic competency profile for the provision of palliative and end of life care: Time for a change? Can Paramed. 2016 Sep;

Cameron C, Carter AJE, Crick S, Edlund D, Pooler C, Arab M, et al. Paramedics and Palliative Care: Bringing Vital Services to Canadians Change Package [Internet]. 2022. Available from:

<https://www.healthcareexcellence.ca/media/it1dax2l/paramedics-palliative-care-change-package-eng.pdf>

Cameron C, Lunn TM, Lanos C, Batt AM. Dealing with dying – progressing paramedics' role in grief support. Prog Palliat Care. 2021;29(2):91–7.

Canadian Centre on Substance Use and Addiction. (2019). Overcoming stigma through language: A primer. Retrieved from <https://www.ccsa.ca/overcoming-stigma-through-language-primer>.

Canadian Institute for Health Information. Measuring Cultural Safety in Health Systems.; 2021:19.

Canadian Institute for Health Information. Measuring Health Inequalities: A Toolkit — Glossary of Terms. Canadian Institute for Health Information; 2018:13.

Canadian Partnership Against Cancer & Health Canada. The Canadian Interdisciplinary Palliative Care Competency Framework [Internet]. Canadian Partnership Against Cancer; 2021 [cited 2022 Jul 1]. Available from:

<https://www.partnershipagaincancer.ca/topics/palliative-care-competency-framework/>

Canadian Partnership Against Cancer, Health Canada. Canadian Interdisciplinary Palliative Care Competency Framework.; 2021:137.

Canadian Virtual Hospice - LivingMyCulture.ca. Canadian Virtual Hospice - LivingMyCulture.ca. Accessed October 25, 2022.

<https://culturalsafetytraining.livingmyculture.ca/>

Carleton, R. N., Afifi, T. O., Taillieu, T., Turner, S., Krakauer, R., Anderson, G. S., ... & McCreary, D. R. (2019). Exposures to potentially traumatic events among public safety personnel in Canada. Canadian Journal of Behavioural Science, 51(1), 37.

Carron PN, Dami F, Diawara F, Hurst S, Hugli O. Palliative care and prehospital emergency medicine: analysis of a case series. Med Baltim. 2014;93(25):e128.

Carter AJE, Arab M, Cameron C, Harrison M, Pooler C, McEwan I, et al. A national collaborative to spread and scale paramedics providing palliative care in Canada: Breaking down silos is essential to success. Prog Palliat Care. 2021;29(2):59–65.

Carter AJE, Arab M, Harrison M, Cameron C, Sullivan J, Lecours M, et al. Providing palliative care brings paramedicine to the next level: A review and comparison of how three provinces have incorporated palliative care into EMS. Can Paramed. 2016 Sep;

Carter AJE, Arab M, Harrison M, Goldstein J, Stewart B, Lecours M, et al. Paramedics providing palliative care at home: A mixed-methods exploration of patient and family satisfaction and paramedic comfort and confidence. CJEM. 2019;21(4):513–22.

Carter AJE, Earle R, Grégoire MC, MacConnell G, MacDonald T, Frager G. Breaking Down Silos: Consensus-Based Recommendations for Improved Content, Structure, and Accessibility of Advance Directives in

Supplementary File 3 – List of cross-referenced and source materials  
Representing Contemporary Paramedic Practice in Canada: Development of the National  
Competency Framework for Paramedics.

Emergency and Out-of-Hospital Settings. J Palliat Med. 2020;23(3):379–88.

Carter AJE, Harrison M, Goldstein J, et al. Providing palliative care at home aligns with the professional identity of paramedics: a qualitative study of paramedics and palliative health care providers. CJEM. Published online September 19, 2022.

<https://doi.org/10.1007/s43678-022-00369-y>

Carter AJE, Harrison M, Kryworuchko J, Kekwaletswe T, Wong ST, Goldstein J, et al. Essential Elements to Implementing a Paramedic Palliative Model of Care: An Application of the Consolidated Framework for Implementation Research. J Palliat Med. 2022;

Čartolovni, A., Stolt, M., Scott, P. A., & Suhonen, R. (2021). Moral injury in healthcare professionals: a scoping review and discussion. Nursing ethics, 28(5), 590-602.

Clemency BM, Grimm KT, Lauer SL, Lynch JC, Pastwik BL, Lindstrom HA, et al. Transport Home and Terminal Extubation by Emergency Medical Services: An Example of Innovation in End-of-Life Care. J Pain Symptom Manage. 2019;58(2):355–9.

Core competencies for public health in Canada <https://www.phac-aspc.gc.ca/php-ppsp/ccph-cesp/pdfs/cc-manual-eng090407.pdf>

Covenant Health Palliative Institute. Alberta Emergency Medical Responders' and Paramedics' Palliative Care Competency Framework: A Resource Manual for Health Care Professionals [Internet]. Covenant Health; 2020 [cited 2022 Jul 1]. Available from: <https://www.covenanthealth.ca/the-palliative-institute/education-and-research/competencies-framework#:~:text=Alberta%20Palliative%20Care%20Competencies%20%26%20Framework%20A%20robust,to%20the%20future%20sustainability%20of%20palliative%20care%20delivery.>

Covenant Health Palliative Institute. Alberta Palliative Care Competency Framework Technical Report [Internet]. Covenant Health; 2020 [cited 2022 Jul 1]. Available from: <https://www.covenanthealth.ca/the-palliative-institute/education-and-research/competencies-framework#:~:text=Alberta%20Palliative%20Care%20Competencies%20%26%20Framework%20A%20robust,to%20the%20future%20sustainability%20of%20palliative%20care%20delivery.>

Curry, S. J., Krist, A. H., Owens, D. K., Barry, M. J., Caughey, A. B., Davidson, K. W., ... & US Preventive Services Task Force. (2018). Screening for intimate partner violence, elder abuse, and abuse of vulnerable adults: US Preventive Services Task Force final recommendation statement. Jama, 320(16), 1678-1687.

D'Amour, D., Ferrada-Videla, M., San Martin Rodriguez, L., & Beaulieu, M. (2005). The conceptual basis for interprofessional collaboration: Core concepts and theoretical frameworks, Journal of Interprofessional Care, 19 (S1), 116-131, <http://doi.org/13561820500082529>

DAOD 5031-8 Canadian Forces Professional Development Programme

DAOD 5070-0, Military Employment Structure

DAOD 5070-1, Military Employment Structure

de Jong, I. C., van der Ham, L. A., & Waltz, M. M. (2022). Responding to persons in mental health crisis: A cross-country comparative study of professionals' perspectives on psychiatric ambulance and street triage models. Journal of Community Safety and Well-Being, 7(Suppl\_1), S36-S44.

Derek R Cooney, Susan Wojcik, Naveen Seth, Corey Vasisko and Kevin Stimson Evaluation of ambulance offload delay at a university hospital emergency department. International Journal of Emergency Medicine

Supplementary File 3 – List of cross-referenced and source materials  
Representing Contemporary Paramedic Practice in Canada: Development of the National  
Competency Framework for Paramedics.

2013, 6:15

<http://www.intjem.com/content/6/1/15>

Desandre PL, Quest TE. Management of cancer-related pain. *Emerg Med Clin North Am.* 2009;27(2):179–94.

Dictionary by Merriam-Webster: America's most-trusted online dictionary. Accessed October 25, 2022. <https://www.merriam-webster.com/>

Duchateau FX. Palliative care and prehospital emergency medicine--apparently conflicting approaches? *Eur J Emerg Med.* 2012;19(1):1.

Duffy, Juliana, Peter Jones, Candace D. McNaughton, Vicki Ling, John Matelski, Renee Y. Hsia, Bruce E. Landon, and Peter Cram. "Emergency Department Utilization, Admissions, and Revisits in the United States (New York), Canada (Ontario), and New Zealand: A Retrospective Cross-Sectional Analysis." *Academic Emergency Medicine* 30, no. 9 (2023): 946–54. <https://doi.org/10.1111/acem.14738>.

Eaton-Williams P, Barrett J, Mortimer C, Williams J. A national survey of ambulance paramedics on the identification of patients with end of life care needs. *Br Paramed J.* 2020;5(3):8–14.

ED Management. 2019. Paramedics empowered to administer addiction treatment to patients in the field. Retrieved from <https://www.reliasmedia.com/articles/144864-paramedics-empowered-to-administer-addiction-treatment-to-patients-in-the-field>.

Ethical issues in emergency department care at the end of life. *Ann Emerg Med.* 2006;47(3):302.

First Nations Information Governance Centre. The First Nations Information Governance Centre. Accessed October 25, 2022. <https://fnigc.ca/>

Fitzsimon J, Gervais O, Lanos C. COVID-19 Assessment and Testing in Rural Communities During the Pandemic: Cross-sectional Analysis. *JMIR Public Health Surveill.* 2022;8(2):e30063. <https://doi.org/10.2196/30063>

Fitzsimon, Jonathan, Oliver Gervais, and Chelsea Lanos. "COVID-19 Assessment and Testing in Rural Communities During the Pandemic: Cross-Sectional Analysis." *JMIR Public Health and Surveillance* 8, no. 2 (February 8, 2022): e30063. <https://doi.org/10.2196/30063>.

Ford-Jones, P. (2019). Mental health and psychosocial calls in the prehospital setting in Ontario: A qualitative case study. [Doctoral dissertation, York University]. Retrieved from [https://yorkspace.library.yorku.ca/xmlui/bitstream/handle/10315/37469/Ford-Jones\\_Polly\\_C\\_2019\\_PhD.pdf?sequence=2&isAllowed=y](https://yorkspace.library.yorku.ca/xmlui/bitstream/handle/10315/37469/Ford-Jones_Polly_C_2019_PhD.pdf?sequence=2&isAllowed=y)

Ford-Jones, P. and Chaufan, C. (2017), "A critical analysis of mental health calls in the prehospital setting", *Inquiry: The Journal of Health Care Organization, Provision, and Financing*, Vol. 54.

Ford-Jones, P. C., & Daly, T. (2022b). Filling the gap: mental health and psychosocial paramedicine programming in Ontario, Canada. *Health & social care in the community*, 30(2), 744-752.

Ford-Jones, P., & Daly, T. (2020a). Paramedicine and mental health: a qualitative analysis of limitations to education and practice in Ontario. *The Journal of Mental Health Training, Education and Practice*, 15(6), 331-345.

Forsythe, L., Heckert, A., Margolis, M. K., Schrandt, S., & Frank, L. (2018). Methods and impact of engagement in research, from theory to practice and back again: Early findings from the Patient-Centered Outcomes Research Institute. *Quality of Life Research : An International Journal of Quality*

Supplementary File 3 – List of cross-referenced and source materials  
Representing Contemporary Paramedic Practice in Canada: Development of the National Competency Framework for Paramedics.

of Life Aspects of Treatment, Care and Rehabilitation, 27(1), 17–31.

<https://doi.org/10.1007/s11136-017-1581-x>

Frisch, N., Atherton, P., Doyle-Waters, M. M., MacLeod, M. L. P., Mallidou, A., Sheane, V., Ward, J., & Woodley, J. (2020a). Patient-oriented research competencies in health (PORCH) for researchers, patients, healthcare providers, and decision-makers: Results of a scoping review. *Research Involvement and Engagement*, 6, 4.

<https://doi.org/10.1186/s40900-020-0180-0>

Frontiers | A Hierarchy of Power: The Place of Patient and Public Involvement in Healthcare Service Development. (n.d.). Retrieved September 15, 2022, from

<https://www.frontiersin.org/articles/10.3389/fsoc.2019.00038/full>

Gage CH, Geduld H, Stassen W. South African paramedic perspectives on prehospital palliative care. *BMC Palliat Care*. 2020;19(1):153.

Goldstein, Judah, Jan L. Jensen, Alix J. E. Carter, Andrew H. Travers, and Kenneth Rockwood. “The Epidemiology of Prehospital Emergency Responses for Older Adults in a Provincial EMS System.” *Canadian Journal of Emergency Medicine* 17, no. 5 (September 2015): 491–96.

<https://doi.org/10.1017/cem.2015.20>.

Goodwin L, Proctor A, Kirby K, Black S, Pocock L, Richardson S, et al. Staff stakeholder views on the role of UK paramedics in advance care planning for patients in their last year of life. *Prog Palliat Care*. 2021;29(2):76–83.

Guerra O, Kurtz D. Building Collaboration: A Scoping Review of Cultural Competency and Safety Education and Training for Healthcare Students and Professionals in Canada. *Teaching and Learning in Medicine*. 2017;29(2):129–142.

<https://doi.org/10.1080/10401334.2016.1234960>

Guide to Acknowledging First Peoples & Traditional Territory | CAUT. Accessed October 23, 2022.

<https://www.caut.ca/content/guide-acknowledging-first-peoples-traditional-territory>

Haag, H., Jones, D., Joseph, T., & Colantonio, A. (2022). Battered and brain injured: traumatic brain injury among women survivors of intimate partner violence—a scoping review. *Trauma, Violence, & Abuse*, 23(4), 1270–1287.

Hamilton, C., Snow, M. E., Clark, N., Gibson, S., Dehnadi, M., Lui, M., Koster, A., McLean, J., & Li, L. C. (2019). Quality of patient, family, caregiver and public engagement in decision-making in healthcare systems: A scoping review protocol. *BMJ Open*, 9(11), e032788.

<https://doi.org/10.1136/bmjopen-2019-032788>

Harrison, J. D., Anderson, W. G., Fagan, M., Robinson, E., Schnipper, J., Symczak, G., Hanson, C., Carnie, M. B., Banta, J., Chen, S., Duong, J., Wong, C., & Auerbach, A. D. (2018). Patient and Family Advisory Councils (PFACs): Identifying Challenges and Solutions to Support Engagement in Research. *Patient*, 11(4), 413–423.

<https://doi.org/10.1007/s40271-018-0298-4>

Hassen N, Lofters A, Michael S, Mall A, Pinto AD, Rackal J. Implementing Anti-Racism Interventions in Healthcare Settings: A Scoping Review. *International Journal of Environmental Research and Public Health*. 2021;18(6):2993.

<https://doi.org/10.3390/ijerph18062993>

health patients to a mental health center vs the emergency department: safety and compliance of an EMS direct transport protocol. *Canadian Journal of Emergency Medicine*, 19(S1), S83–S84.

Health Standards Organization, Standards Council of Canada. First Nations, Métis, and

### Supplementary File 3 – List of cross-referenced and source materials

#### Representing Contemporary Paramedic Practice in Canada: Development of the National Competency Framework for Paramedics.

Inuit Cultural Safety and Humility. Health Standards Organization; 2021:102.

Helmer J, Baranowski L, Armour R, Tallon J, Willisroft D, Brittain M. Developing a paramedic approach to palliative emergencies. *Prog Palliat Care*. 2021;29(2):72–8.

Helmer J. BCEHS Paramedic Competency Framework- Paramedic Approach to Palliative Emergencies. BCEHS; 2019.

Hendin A, Hartwick M, Healey A, Fischer L. Improving end-of-life care in the emergency department: Development of a standardized approach to an imminently dying patient. *CJEM*. 2020;22(5):626–8.

Herring, A. (2022). Buprenorphine initiation after reversal of opioid overdose: A new standard of care. Retrieved from [https://www.acep.org/contentassets/7294b096dabd41c68aae5c5680612563/herring\\_bup-after-od\\_e-qualfinal.pdf](https://www.acep.org/contentassets/7294b096dabd41c68aae5c5680612563/herring_bup-after-od_e-qualfinal.pdf).

Hoare S, Kelly MP, Prothero L, Barclay S. Ambulance staff and end-of-life hospital admissions: A qualitative interview study. *Palliat Med*. 2018;32(9):1465–73.

Holliday H, Ontario Local Health Integration Network, Cancer Care Ontario. The Ontario Palliative Care Competency Framework.; 2019:181.  
<https://www.ontariopalliativecarenetwork.ca/sites/opcn/files/2021-01/OPCNCompetencyFramework.pdf#:~:text=The%20Ontario%20Palliative%20Care%20Competency%20Framework%20describes%20the,for%20Adults%20with%20a%20Progressive%20Life-Limiting%20Illness%20>  
<https://doi.org/10.1186/s12913-020-05343-x>

Iacobucci G. Half of ambulance trusts have no record of terminally ill patients' end of life wishes. *BMJ*. 2014;349:g5015.

ICS Canada Curriculum and Training Standards 2019:

<https://www.icscanada.ca/images/upload/docs/ICS%20Canada%20Curricular%20and%20Training%20Standards%202020.pdf>

Indigenous Primary Health Council, Ontario Public Health. Cultural Competency Guideline for Ontario Public Health Units to Engage Successfully with Aboriginal Communities. Indigenous Primary Health Council; 2018.  
[https://www.nccih.ca/634/Cultural\\_Competency\\_Guideline\\_for\\_Ontario\\_Public\\_Health\\_Units\\_to\\_Engage\\_Successfully\\_with\\_Aboriginal...nccih?id=1082&col=3](https://www.nccih.ca/634/Cultural_Competency_Guideline_for_Ontario_Public_Health_Units_to_Engage_Successfully_with_Aboriginal...nccih?id=1082&col=3)

Joluta. (2022). Community paramedicine and harm reduction for substance abuse. Retrieved from <https://www.joluta.com/news/community-paramedicine-and-harm-reduction-for-substance-abuse/>.

Juhrmann ML, Anderson NE, Boughey M, et al. Palliative paramedicine: Comparing clinical practice through guideline quality appraisal and qualitative content analysis. *Palliat Med*. 2022;36(8):1228-1241.  
<https://doi.org/10.1177/02692163221110419>

Juhrmann ML, Vandersman P, Butow PN, Clayton JM. Paramedics delivering palliative and end-of-life care in community-based settings: A systematic integrative review with thematic synthesis. *Palliat Med*. 2022;36(3):405–21.

Kao YH, Liu YT, Koo M, Chiang JK. Factors associated with emergency services use in Taiwanese advanced cancer patients receiving palliative home care services during out-of-hours periods: a retrospective medical record study. *BMC Palliat Care*. 2018;17(1):46.

Kendi IX. *How To Be An Antiracist*. One World; 2019.

Kitty D, Funnell S, The College of Family Physicians of Canada. *CanMEDS-Family Medicine Indigenous Health Supplement*. The

Supplementary File 3 – List of cross-referenced and source materials  
Representing Contemporary Paramedic Practice in Canada: Development of the National  
Competency Framework for Paramedics.

College of Family Physicians of Canada;  
2020:49. <https://www.cfpc.ca/en/education-professional-development/educational-frameworks-and-reference-guides/canmeds-family-medicine>

Kivanc J. Community paramedics could take pressure off buckling health care system, advocates say. The Globe and Mail. <https://www.theglobeandmail.com/canada/article-paramedics-healthcare-emergency-room-shortages/>. Published August 11, 2022. Accessed October 10, 2022.

Ko, S. J., Ford, J. D., Kassam-Adams, N., Berkowitz, S. J., Wilson, C., Wong, M., ... & Layne, C. M. (2008). Creating trauma-informed systems: Child welfare, education, first responders, health care, juvenile justice. *Professional psychology: Research and practice*, 39(4), 396.

Kwako, L. E., Glass, N., Campbell, J., Melvin, K. C., Barr, T., & Gill, J. M. (2011). Traumatic brain injury in intimate partner violence: a critical review of outcomes and mechanisms. *Trauma, violence & abuse*, 12(3), 115–126. <https://doi.org/10.1177/1524838011404251>

Lamba S, Schmidt TA, Chan GK, Todd KH, Grudzen CR, Weissman DE, et al. Integrating palliative care in the out-of-hospital setting: four things to jump-start an EMS-palliative care initiative. *Prehosp Emerg Care*. 2013;17(4):511–20.

Lavallee, Dc, E Abu-Rish Blakeney, Y Yu, R Johnson, Da Liner, NI Murphy, Sb Pambianco, et al. “Engaging Patients and Families to Transform Heart Failure Care.” *Journal of Interprofessional Care* 34, no. 6 (November 2020): 835–38. <https://doi.org/10.1080/13561820.2019.1696286>.

Lawson BJ, Burge FI, McIntyre P, Field S, Maxwell D. Can the Introduction of an Integrated Service Model to an Existing Comprehensive Palliative Care Service Impact Emergency Department Visits among

Enrolled Patients? *J Palliat Med*. 2009 Mar;12(3):245–52.

Learning Essential Approaches to Palliative Care (LEAP): Paramedic [Internet]. Pallium; [cited 2022 Jul 1]. Available from: <https://www.pallium.ca/course/leap-paramedic/>

LeFrançois, B., Menzies, R. & Reaume, G. (Eds.) *Mad Matters: A Critical Reader in Canadian Mad Studies* (pp. 79-90). Toronto: Canadian Scholars’ Press Inc.

Lentz, L. M., Smith-MacDonald, L., Malloy, D., Carleton, R. N., & Brémault-Phillips, S. (2021). Compromised conscience: a scoping review of moral injury among firefighters, paramedics, and police officers. *Frontiers in psychology*, 12, 639781.

Leyenaar M, McLeod B, Chan J, Tavares W, Costa A, Agarwal G. A scoping study and qualitative assessment of care planning and case management in community paramedicine. *Ir J Paramed*. 2018;3(1). <https://doi.org/10.32378/ijp.v3i1.76>

Leyenaar MS, Allana A, Sinha SK, et al. Relevance of assessment items in community paramedicine home visit programmes: results of a modified Delphi study. *BMJ Open*. 2021;11(11):e048504. <https://doi.org/10.1136/bmjopen-2020-048504>

Leyenaar MS, McLeod B, Penhearow S, et al. What do community paramedics assess? An environmental scan and content analysis of patient assessment in community paramedicine. *Can J Emerg Med*. 2019;21(6):766–775. <https://doi.org/10.1017/cem.2019.379>

Lord B, Andrew E, Henderson A, Anderson DJ, Smith K, Bernard S. Palliative care in paramedic practice: A retrospective cohort study. *Palliat Med*. 2019;33(4):445–51.

Lord B, Récoché K, O’Connor M, Yates P, Service M. Paramedics’ perceptions of their

Supplementary File 3 – List of cross-referenced and source materials  
Representing Contemporary Paramedic Practice in Canada: Development of the National  
Competency Framework for Paramedics.

role in palliative care: analysis of focus group transcripts. *J Palliat Care*. 2012;28(1):36–40.

Makrides, Timothy, Linda Ross, Cameron Gosling, Joseph Acker, and Peter O’Meara. “From Stretcher Bearer to Practitioner: A Brief Narrative Review of the History of the Anglo-American Paramedic System.” *Australasian Emergency Care* 25, no. 4 (December 1, 2022): 347–53.  
<https://doi.org/10.1016/j.auec.2022.05.001>.

Maldonado, J. R., Sher, Y., Ashouri, J. F., Hills-Evans, K., Swendsen, H., Lolak, S., & Miller, A. C. (2014). The “Prediction of Alcohol Withdrawal Severity Scale”(PAWSS): systematic literature review and pilot study of a new scale for the prediction of complicated alcohol withdrawal syndrome. *Alcohol*, 48(4), 375-390.

Maldonado, J. R., Sher, Y., Das, S., Hills-Evans, K., Frenklach, A., Lolak, S., ... & Neri, E. (2015). Prospective validation study of the Prediction of Alcohol Withdrawal Severity Scale (PAWSS) in medically ill inpatients: a new scale for the prediction of complicated alcohol withdrawal syndrome. *Alcohol and Alcoholism*, 50(5), 509-518.

Malla, A., Joobar, R., & Garcia, A. (2015). “Mental illness is like any other medical illness”: a critical examination of the statement and its impact on patient care and society. *Journal of Psychiatry and Neuroscience*, 40(3), 147-150.

Martin AC, O’Meara P. Community paramedicine through multiple stakeholder lenses using a modified soft systems methodology. *Australas J Paramed*. 2020;17.  
<https://doi.org/10.33151/ajp.17.793>

Martin AC, O’Meara P. Perspectives from the frontline of two North American community paramedicine programs: an observational, ethnographic study. *Rural Remote Health*. 2019;19(1):4888.  
<https://doi.org/10.22605/RRH4888>

McGinley J, Waldrop DP, Clemency B. Emergency medical services providers’ perspective of end-of-life decision making for people with intellectual disabilities. *J Appl Res Intellect Disabil*. 2017;30(6):1057–64.

McMahon, Graham T. “Learning Together: Engaging Patients as Partners in CPD.” *Journal of Continuing Education in the Health Professions* 41, no. 4 (Fall 2021): 268–72.  
<https://doi.org/10.1097/CEH.0000000000000388>

Mills CW. *The Social Imagination*. 1959th ed. Oxford University Press; 1959.

Mills, C. (2015). *The psychiatrization of poverty: Rethinking the mental health-poverty nexus*.

Minister of Justice, Government of Canada. *Canadian Human Rights Act*.; 1985. Accessed October 22, 2022.  
<https://www.laws-lois.justice.gc.ca/PDF/H-6.pdf>

Montgomery CL, Pooler C, Arsenault JE, Berean C, Sharman R, Cameron CL, et al. Innovative Urgent Care for the Palliative Patient at Home. *Home Healthc Now*. 2017;35(4):196–201.

Muise A. Palliative Support by Emergency Medical Services for Persons at the End of Life: A Population Based Analysis of Need. 2015 Apr 2 [cited 2022 Nov 2]; Available from: <https://DalSpace.library.dal.ca/handle/1022/56298>

Murphy S, Van der Velde J. Paramedics’ Perceptions of Their Role in End of Life Care. *Ir Med J*. 2022;115(4):578.

Murphy-Jones G, Laverty D, Stonehouse J. Infusing the palliative into paramedicine: Inter-professional collaboration to improve the end of life care response of UK ambulance services. *Prog Palliat Care*. 2021;29(2):66–71.

Supplementary File 3 – List of cross-referenced and source materials  
Representing Contemporary Paramedic Practice in Canada: Development of the National  
Competency Framework for Paramedics.

Murphy-Jones G, Timmons S. Paramedics' experiences of end-of-life care decision making with regard to nursing home residents: an exploration of influential issues and factors. *Emerg Med J*. 2016;33(10):722–6.

Murray, Regan M., Andrea L. Davis, Lauren J. Shepler, Lori Moore-Merrell, William J. Troup, Joseph A. Allen, and Jennifer A. Taylor. "A Systematic Review of Workplace Violence Against Emergency Medical Services Responders." *New Solutions: A Journal of Environmental and Occupational Health Policy*: NS 29, no. 4 (February 2020): 487–503. <https://doi.org/10.1177/1048291119893388>.

Myall M, Rowsell A, Lund S, Turnbull J, Arber M, Crouch R, et al. Death and dying in prehospital care: what are the experiences and issues for prehospital practitioners, families and bystanders? A scoping review. *BMJ Open*. 2020;10(9):e036925.

National Emergency Nurses Association. 2019. Emergency Nursing Core Competencies. <https://nena.ca/wp-content/uploads/2023/04/NENA-Core-Competencies-10%E2%80%A211%E2%80%A219.pdf>

Nelson H, Mott S, Kleinman ME, Goldstein RD. Parents' Experiences of Pediatric Palliative Transports: A Qualitative Case Series. *J Pain Symptom Manage*. 2015;50(3):375–80.

Nelson, H. D., Bougatsos, C., & Blazina, I. (2012). Screening women for intimate partner violence: a systematic review to update the US Preventive Services Task Force recommendation. *Annals of internal medicine*, 156(11), 796-808.

Newman, B., Joseph, K., Chauhan, A., Seale, H., Li, J., Manias, E., Walton, M., Mears, S., Jones, B., & Harrison, R. (2021). Do patient engagement interventions work for all patients? A systematic review and realist synthesis of interventions to enhance patient

safety. *Health Expectations*, 24(6), 1905–1923. <https://doi.org/10.1111/hex.13343>

Nixon SA. The coin model of privilege and critical allyship: implications for health. *BMC Public Health*. 2019;19(1):1637. <https://doi.org/10.1186/s12889-019-7884-9>

Noje C, Bernier ML, Costabile PM, Klein BL, Kudchadkar SR. Pediatric Critical Care Transport as a Conduit to Terminal Extubation at Home: A Case Series. *Pediatr Crit Care Med*. 2017;18(1):e4–8.

Nova Scotia Health Authority. Nova Scotia Palliative Care Competency Framework: A Reference Guide for Health Professionals and Volunteers [Internet]. Nova Scotia Health; 2017 [cited 2022 Jul 1]. Available from: <https://library.nshealth.ca/PalliativeCare>

O'Meara P, Ruest M, Stirling C. Community paramedicine: Higher education as an enabling factor. *Australas J Paramed*. 2014;11(2). <https://doi.org/10.33151/ajp.11.2.22>

O'Meara P, Stirling C, Ruest M, Martin A. Community paramedicine model of care: an observational, ethnographic case study. *BMC Health Serv Res*. 2016;16(1):39. <https://doi.org/10.1186/s12913-016-1282-0>

Ontario Palliative Care Network. The Ontario Palliative Care Competency Framework: A Reference Guide for Health Professionals and Volunteers [Internet]. Ontario Health; 2019 [cited 2022 Jul 1]. Available from: <https://www.ontariopalliativecarenetwork.ca/resources/palliative-care-competency-framework>

Orchard, C., Bainbridge, L., Bassendowski, S., Stevenson, K., Wagner, S. J., Weinberg, L., ... & Sawatsky-Girling, B. (2010). A national interprofessional competency framework. <https://phabc.org/wp-content/uploads/2015/07/CIHC-National-Interprofessional-Competency-Framework.pdf>

Supplementary File 3 – List of cross-referenced and source materials  
Representing Contemporary Paramedic Practice in Canada: Development of the National Competency Framework for Paramedics.

- Palliative Institute. Alberta Emergency Medical Responders' and Paramedics' Palliative Care Competency Framework. Covenant Health; 2020:28.  
<https://www.covenanthealth.ca/the-palliative-institute/education-and-research/competencies-framework>
- Papps E, Ramsden I. Cultural safety in nursing: the New Zealand experience. *Int J Qual Health Care*. 1996;8(5):491-497.  
<https://doi.org/10.1093/intqhc/8.5.491>
- Paramedic Association of Canada. Canadian Paramedic Profile: Paramedic Roles. Paramedic Association of Canada; 2016.
- Paramedic Association of Canada. National Occupational Competency Profile. Paramedic Association of Canada; 2011.
- Parmar, J., Anderson, S., Duggleby, W., Holroyd-Leduc, J., Pollard, C., & Brémault-Phillips, S. (2021). Developing person-centred care competencies for the healthcare workforce to support family caregivers: Caregiver centred care. *Health & Social Care in the Community*, 29(5), 1327–1338.  
<https://doi.org/10.1111/hsc.13173>
- Patient And Family Engagement: A Framework For Understanding The Elements And Developing Interventions And Policies | Health Affairs. (n.d.). Retrieved September 14, 2022, from  
<https://www.healthaffairs.org/doi/citedby/10.1377/hlthaff.2012.1133>
- Patterson R, Standing H, Lee M, Dalkin S, Lhussier M, Exley C, et al. Paramedic information needs in end-of-life care: a qualitative interview study exploring access to a shared electronic record as a potential solution. *BMC Palliat Care*. 2019;18(1):108.
- Pease NJ, Sundararaj JJ, O'Brian E, Hayes J, Presswood E, Buxton S. Paramedics and serious illness: communication training. *BMJ Support Palliat Care*. 2022;12(e2):e248–55.
- Pekarsky B, Seymour-Walsh A, Wright C, Hooper M, Carter C. The role of ambulance services in reducing the gaps in access to end-of-life care: from conversations to policy. *Prog Palliat Care*. 2021;29(2):98–105.
- Peran D, Uhler M, Pekara J, Kolouch P, Loucka M. Approaching the End of Their Lives Under Blue Lights and Sirens - Scoping Review. *J Pain Symptom Manage*. 2021;62(6):1308–18.
- Pereira MED, Barbosa A, Dixe MDA. Palliative care for end-of-life patients in a basic emergency service. *Scand J Caring Sci*. 2018;32(3):1056–63.
- Peters, S. (2018). Words Matter: The importance of language choice in mental health care. Retrieved from  
<https://www.madinamerica.com/2018/03/words-matter-importance-language-choice-mental-health-care/>
- Pettifer A, Bronnert R. End of life care in the community: the role of ambulance clinicians. *J Paramed Pract*. 2013 Jul;5(7):394–9.
- Prachanukool T, Yuksen C, Jintanavasan S, Jenpanitpong C, Watcharakitpaisan S, Kaninworapan P, et al. Decision-Making by Emergency Medicine Personnel in Prehospital Treatment of Patients Receiving Palliative Care: A Questionnaire, Comparative Cohort Study. *Adv Med Educ Pr*. 2021;12:1111–8.
- Preparing for infectious disease threats at mass gatherings: the case of the Vancouver 2010 Olympic Winter Games  
<https://doi.org/10.1503/cmaj.100093>
- Pritchard, Jodie, Sara Alavian, Anantha Soogoor, Susan Bartels, and Andrew Hall. “Global Health Competencies in Postgraduate Medical Education: A Scoping Review and Mapping to the CanMEDS Physician Competency Framework.” *Canadian Medical Education Journal*, November 14, 2022.  
<https://doi.org/10.36834/cmej.75275>

Supplementary File 3 – List of cross-referenced and source materials  
Representing Contemporary Paramedic Practice in Canada: Development of the National  
Competency Framework for Paramedics.

Raja, S. , Hasnain, M. , Hoersch, M. , Gove-  
Yin, S. & Rajagopalan, C. (2015). Trauma  
Informed Care in Medicine. *Family &  
Community Health*, 38 (3), 216-226.  
<https://doi.org/10.1097/FCH.0000000000000071>

Rausch PG, Ramzy AI. Development of a  
palliative care protocol for emergency  
medical services. *Ann Emerg Med*.  
1991;20(12):1383–6.

Reavley, N. J., Jorm, A. F., & Morgan, A. J.  
(2016). Beliefs about dangerousness of  
people with mental health problems: the role  
of media reports and personal exposure to  
threat or harm. *Social Psychiatry and  
Psychiatric Epidemiology*, 51(9), 1257-1264.

Reeves, S., Xyrichis, A., & Zwarenstein, M.  
(2018). Teamwork, collaboration,  
coordination, and networking: Why we need  
to distinguish between different types of  
interprofessional practice, *Journal of  
Interprofessional Care*, 32(1), 1-3.  
<http://doi.org/10.1080/13561820.2017.1400150>

Richardson F, Kelly S. Working the Gap:  
Negotiating “Private Troubles” and “Public  
Issues.” *The International Journal of Diverse  
Identities*. 2015;14(1):1-7.  
<https://doi.org/10.18848/2327-7866/CGP/v14i01/58048>

Rolfe S, Garnham L, Godwin J, Anderson I,  
Seaman P, Donaldson C. Housing as a social  
determinant of health and wellbeing:  
developing an empirically-informed realist  
theoretical framework. *BMC Public Health*.  
2020;20(1):1138.  
<https://doi.org/10.1186/s12889-020-09224-0>

Rosser M. Palliative care emergencies. 2:  
Management. *Nurs Times*. 2007;103(34):26–  
7.

Ruest M, Stichman A, Day C. Evaluating the  
impact on 911 calls by an in-home  
programme with a multidisciplinary team. *Int*

*Paramed Pract*. 2012;2(2):41-48.  
<https://doi.org/10.12968/ippr.2012.2.2.41>

Salvatore Silvestri, Joanne Sun, Scott  
Gutovitz, George Ralls, and Linda Papa., An  
Emergency Department Paramedic Staffing  
Model Significantly Improves EMS Transport  
Unit Offload Time – A Novel Approach to an  
ED Crowding Challenge. *Emergency Med*  
2014, 4:6 <https://doi.org/10.4172/2165-7548.1000221>

Saskatchewan College of Paramedics.  
Community Paramedic Competency Profile.  
Saskatchewan College of Paramedics;

Sawyer, S., Coles, J., Williams, A., Williams,  
B. (2018). Paramedics as a new resource for  
women experiencing intimate partner  
violence. *Journal of Interpersonal Violence*,  
0(00), 1-20.

Schrijvers D, van Fraeyenhove F.  
Emergencies in Palliative Care. *Cancer J*.  
2010 Oct;16(5):514–20.

Seow H, Barbera L, Pataky R, Lawson B,  
O’Leary E, Fassbender K, et al. Does  
Increasing Home Care Nursing Reduce  
Emergency Department Visits at the End of  
Life? A Population-Based Cohort Study of  
Cancer Decedents. *J Pain Symptom Manage*.  
2016 Feb 1;51(2):204–12.

Seow H, Pataky R, Lawson B, O’Leary EM,  
Sutradhar R, Fassbender K, et al. Temporal  
association between home nursing and  
hospital costs at end of life in three  
provinces. *Curr Oncol*. 2016 Feb;23(Suppl  
1):S42–51.

Seow H, Sutradhar R, McGrail K, Fassbender  
K, Pataky R, Lawson B, et al. End-of-Life  
Cancer Care: Temporal Association between  
Homecare Nursing and Hospitalizations. *J  
Palliat Med*. 2016 Mar;19(3):263–70.

Shannon B, Eaton G, Lanos C, et al. The  
development of community paramedicine; a  
restricted review. *Health Soc Care*

Supplementary File 3 – List of cross-referenced and source materials  
Representing Contemporary Paramedic Practice in Canada: Development of the National  
Competency Framework for Paramedics.

Community. n/a(n/a).

<https://doi.org/10.1111/hsc.13985>

Sharples, L., Nguyen, C., Singh, B., & Lin, S. (2018). Identifying opportunities to improve intimate partner violence screening in a primary care system. *Family medicine*, 50(9), 702-705.

Sheryl Thompson, Polly Ford-Jones. Cultural competency, humility, and safety in paramedicine - Canadian Paramedicine. Canadian Paramedicine - Research, Articles and EMS News. Published May 4, 2022. Accessed October 10, 2022.

<https://canadianparamedicine.ca/cultural-competency-humility-and-safety-in-paramedicine/>

Shlamovitz GZ, Elsayem A, Todd KH. Ketamine for palliative sedation in the emergency department. *J Emerg Med*. 2013;44(2):355–7.

Shneiderman S, Amburgey E. Ethnicity. Cambridge Encyclopedia of Anthropology. Published online August 22, 2022. Accessed October 25, 2022.

<https://www.anthroencyclopedia.com/entry/ethnicity>

Sibbald, S. L., Kokorelias, K. M., Embuldeniya, G., & Wodchis, W. P. (2022). Engagement of patient and family advisors in health system redesign in Canada. *Journal of Health Services Research & Policy*, 13558196221109056.

<https://doi.org/10.1177/13558196221109056>

Siegel M, Bigelow S. Palliative Care Symptom Management in The Emergency Department: The ABC's of Symptom Management for The Emergency Physician. *J Emerg Med*. 2018;54(1):25–32.

Smith-MacDonald, L., Lentz, L., Malloy, D., Brémault-Phillips, S., & Carleton, R. N. (2021). Meat in a seat: a grounded theory study exploring moral injury in Canadian public safety communicators, firefighters,

and paramedics. *International journal of environmental research and public health*, 18(22), 12145.

*Social and Personality Psychology Compass*, 9(5), 213-222.

Stone SC, Abbott J, McClung CD, Colwell CB, Eckstein M, Lowenstein SR. Paramedic knowledge, attitudes, and training in end-of-life care. *Prehosp Disaster Med*. 2009;24(6):529–34.

Surakka LK, Hökkä M, Törrönen K, Mäntyselkä P, Lehto JT. Paramedics' experiences and educational needs when participating end-of-life care at home: A mixed method study. *Palliat Med*. 2022;2692163221105593.

Surakka LK, Peake MM, Kiljunen MM, Mäntyselkä P, Lehto JT. Preplanned participation of paramedics in end-of-life care at home: A retrospective cohort study. *Palliat Med*. 2021;35(3):584–91.

Taghavi M, Simon A, Kappus S, Meyer N, Lassen CL, Klier T, et al. Paramedics experiences and expectations concerning advance directives: a prospective, questionnaire-based, bi-centre study. *Palliat Med*. 2012;26(7):908–16.

Tavares W, Allana A, Beaune L, Weiss D, Blanchard I. Principles to Guide the Future of Paramedicine in Canada. *Prehospital Emergency Care*. Published online August 30, 2021:1-11.

<https://doi.org/10.1080/10903127.2021.1965680>

Tavares W, Bowles R, Donelon B. Informing a Canadian paramedic profile: framing concepts, roles and crosscutting themes. *BMC Health Serv Res*. 2016;16(1):477.

<https://doi.org/10.1186/s12913-016-1739-1>

Tavares, W., Allana, A., Beaune, L., Weiss, D., & Blanchard, I. (2022). Principles to guide the future of paramedicine in Canada. *Prehospital Emergency Care*, 26(5), 728-738.

Supplementary File 3 – List of cross-referenced and source materials  
Representing Contemporary Paramedic Practice in Canada: Development of the National  
Competency Framework for Paramedics.

<http://doi.org/10.1080/10903127.2021.1965680>

Thurman, W.A., Moczygamba, L.R., Tormey, K., Hudzik, A., Welton-Arndt, L., & Okoh, C. (2021). A scoping review of community paramedicine: evidence and implications for interprofessional practice, *Journal of Interprofessional Care*, 35(2), 229-239.  
<http://doi.org/10.1080/13561820.2020.1732312>

Training curriculum to help patient representatives participate meaningfully in the development of clinical practice guidelines | *BMJ Evidence-Based Medicine*. (n.d.). Retrieved September 15, 2022, from <https://ebm.bmj.com/content/24/6/227.abstract>

Truth and Reconciliation Commission of Canada. Honouring the Truth, Reconciling for the Future: Summary of the Final Report of the Truth and Reconciliation Commission of Canada.; 2015. Accessed March 30, 2021.  
[http://epe.lac-bac.gc.ca/100/201/301/weekly\\_acquisition\\_lists/2015/w15-24-F-E.html/collections/collection\\_2015/trc/IR4-7-2015-eng.pdf](http://epe.lac-bac.gc.ca/100/201/301/weekly_acquisition_lists/2015/w15-24-F-E.html/collections/collection_2015/trc/IR4-7-2015-eng.pdf)

Turpel-Lanfond (Aki-Kwe) ME. In Plain Sight: Addressing Indigenous-Specific Racism and Discrimination in B.C. Health Care.; 2020.  
[https://engage.gov.bc.ca/app/uploads/sites/613/2021/02/In-Plain-Sight-Data-Report\\_Dec2020.pdf1\\_.pdf](https://engage.gov.bc.ca/app/uploads/sites/613/2021/02/In-Plain-Sight-Data-Report_Dec2020.pdf1_.pdf)

United Nations. United Nations Declaration on the Rights of Indigenous Peoples.; 2007:32. Accessed October 25, 2022.  
[https://www.un.org/development/desa/indigenouspeoples/wp-content/uploads/sites/19/2018/11/UNDRIP\\_E\\_web.pdf](https://www.un.org/development/desa/indigenouspeoples/wp-content/uploads/sites/19/2018/11/UNDRIP_E_web.pdf)

Usher, Susan, and Jean-Louis Denis. “Exploring Expectations and Assumptions in the Public and Patient Engagement Literature: A Meta-Narrative Review.” *Patient*

*Education and Counseling* 105, no. 8 (August 1, 2022): 2683–92.

<https://doi.org/10.1016/j.pec.2022.04.001>.

Vaillancourt, C., Charette, M., Hall, E., & McLeod, B. (2018). Patient and paramedic engagement in prehospital emergency medicine research. *CMAJ : Canadian Medical Association Journal = Journal de l'Association Medicale Canadienne*, 190(Suppl), S48–S49.  
<https://doi.org/10.1503/cmaj.180352>

van Vuuren J, Thomas B, Agarwal G, et al. Reshaping healthcare delivery for elderly patients: the role of community paramedicine; a systematic review. *BMC Health Serv Res*. 2021;21(1):29.  
<https://doi.org/10.1186/s12913-020-06037-0>

Waldrop D, Clemency B, Maguin E, Lindstrom H. Prehospital providers' perceptions of emergency calls near life's end. *Am J Hosp Palliat Care*. 2015;32(2):198–204.

Waldrop DP, Clemency B, Lindstrom HA, Clemency Cordes C. “We Are Strangers Walking Into Their Life-Changing Event”: How Prehospital Providers Manage Emergency Calls at the End of Life. *J Pain Symptom Manage*. 2015;50(3):328–34.

Waldrop DP, McGinley JM, Dailey MW, Clemency B. Decision-Making in the Moments Before Death: Challenges in Prehospital Care. *Prehosp Emerg Care*. 2019;23(3):356–63.

Waldrop DP, Waldrop MR, McGinley JM, Crowley CR, Clemency B. Managing Death in the Field: Prehospital End-of-Life Care. *J Pain Symptom Manage*. 2020;60(4):709–716.e2.

Wei, H., Horns, P., Sears, S.F., Huang, K., Smith, C.M., & Wei, T.L. (2022) A systematic meta-review of systematic reviews about interprofessional collaboration: facilitators, barriers, and outcomes, *Journal of Interprofessional Care*, 36(5), 735-749.  
<http://doi.org/10.1080/13561820.2021.1973975>

Supplementary File 3 – List of cross-referenced and source materials  
Representing Contemporary Paramedic Practice in Canada: Development of the National  
Competency Framework for Paramedics.

Westenra B. A Framework for Cultural Safety  
in Paramedic Practice. *Whitireia journal of  
nursing, health and social services*, 2019;  
n.26:p.11-17

Whalley L, Royal College of Physicians and  
Surgeons of Canada. CanMEDS-Physician  
Competency Framework. Royal College of  
Physicians and Surgeons of Canada;  
2015:35. Royal College of Physicians and  
Surgeons of Canada  
[https://canmeds.royalcollege.ca/uploads/en  
/framework/CanMEDS%202015%20Framewo  
rk\\_EN\\_Reduced.pdf](https://canmeds.royalcollege.ca/uploads/en/framework/CanMEDS%202015%20Framework_EN_Reduced.pdf)

Wiese CH, Bartels UE, Ruppert D, Marung H,  
Luiz T, Graf BM, et al. Treatment of palliative  
care emergencies by prehospital emergency  
physicians in Germany: an interview based  
investigation. *Palliat Med*. 2009;23(4):369–73.

Wiese CH, Lassen CL, Bartels UE, Taghavi M,  
Elhabash S, Graf BM, et al. International  
recommendations for outpatient palliative  
care and prehospital palliative emergencies -  
a prospective questionnaire-based  
investigation. *BMC Palliat Care*. 2013;12:10.

Wilkerson I. *Caste: The Origins of Our  
Discontents*. Random House; 2020.

Wood, E., Albarqouni, L., Tkachuk, S., Green,  
C., Ahamad, K., Nolan, S., McLean, M., &  
Klimas, J. (2018). Will this hospitalized patient  
develop severe alcohol withdrawal  
syndrome?: The rational clinical examination  
systematic review. *JAMA*, 320(8), 825.
